# Supplementary material
Source: ML conference proceedings conference paper supplement (https://openreview.net/forum?id=riCIeP6LzEE)
Supplement: supplementary_material [file attachment]

# [Reproducibility Challenge] RigL

This repository hosts source code for our reproducibility report on [Rigging the Lottery: Making all Tickets Winners](#), published at ICML 2020.

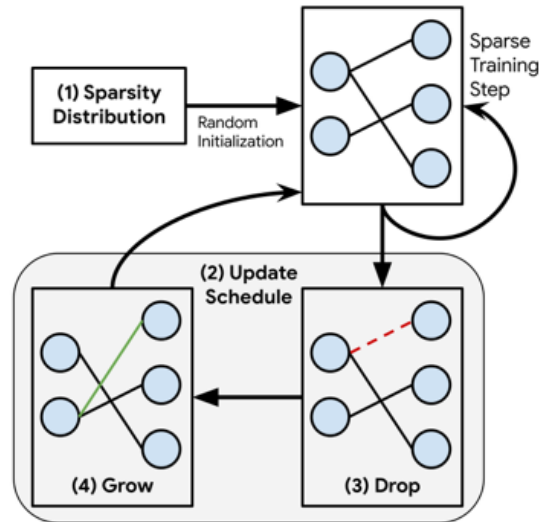

Figure Courtesy: Evci et al. 2020.

## Getting Started

### ▼ Install

- python3.8
- pytorch : 1.7.0+ (GPU support preferable).

Then,

- `make install`

### ▼ W&B API key

Copy your WandB API key to `wandb_api.key`. Will be used to login to your dashboard for visualisation. Alternatively, you can skip W&B visualisation, and set `wandb.use=False` while running the python code or `USE_WANDB=False` while running make commands.

### ▼ Unit Tests

`make test`. Run `make help` to see specific make commands.

### ▼ API Documentation

See `docs/index.html`, autogenerated via Sphinx. Run `make docs.github` to refresh.

## Example Code

### ▼ Train WideResNet-22-2 with RigL on CIFAR10

```
make cifar10.ERK.RigL DENSITY=0.2 SEED=0
```

Change `DENSITY` incase you want to use a different density (1 - sparsity) level. See `outputs/CIFAR10/RigL_ERK/0.2/` for checkpoints etc.

### ▼ Train ResNet-50 with SNFS on CIFAR100

```
make cifar100.ERK.SNFS DENSITY=0.2 SEED=0
```

See `outputs/CIFAR100/SNFS_ERK/0.2` for checkpoints etc.

### ▼ Evaluate WideResNet-22-2 with RigL on CIFAR10

Either train WRN-22-2 with RigL as described above, or download checkpoints from [here](#). Place under `outputs/CIFAR10/RigL_ERK/0.2/+specific=cifar10_wrn_22_2_masking,seed=0` .

```
make cifar10.ERK.RigL DENSITY=0.2 SEED=0
```

### ▼ Evaluate ResNet-50 with SNFS on CIFAR100

Either train ResNet-50 with SNFS as described above, or download checkpoints from [here](#). Place under `outputs/CIFAR100/SNFS_ERK/0.2/+specific=cifar100_resnet50_masking,seed=0` .

```
make cifar100.ERK.SNFS DENSITY=0.2 SEED=0
```

## Main Results

### ▼ Pre-trained Models

All checkpoints can be found [here](#). Place folders under `outputs/` .

### ▼ Commands

The following make command runs all the main results described in our reproducibility report.

```
make cifar10 DENSITY=0.05,0.1,0.2,0.5
make cifar100 DENSITY=0.05,0.1,0.2,0.5
make cifar10_tune DENSITY=0.05,0.1,0.2,0.5
```

Use the `-n` flag to see which commands are executed. Note that these runs are executed sequentially, although we include parallel processes for cifar10 runs of a particular method. Eg: `cifar10.Random.RigL` runs RigL Random for densities `0.05,0.1,0.2,0.5` , `seed=0` in parallel.

It may be preferable to run specific make commands in parallel for this reason. See `make help` for an exhaustive list.

### ▼ Table of Results

Shown for 80% sparsity (20% density) on CIFAR10. For exhaustive results and their analysis refer to our report.

| Method      | Accuracy (Test)    | FLOPS (Train, Test) |
|-------------|--------------------|---------------------|
| Small Dense | 91.0 ± 0.07        | 0.20x, 0.20x        |
| Static      | 91.2 ± 0.16        | 0.20x, 0.20x        |
| SET         | 92.7 ± 0.28        | 0.20x, 0.20x        |
| RigL        | 92.6 ± 0.10        | 0.20x, 0.20x        |
| SET (ERK)   | 92.9 ± 0.16        | 0.35x, 0.35x        |
| RigL (ERK)  | <b>93.1 ± 0.09</b> | 0.35x, 0.35x        |
| Pruning     | 93.2 ± 0.27        | 0.41x, 0.27x        |
| RigL_2x     | 93.0 ± 0.21        | 0.41x, 0.20x        |

|               |             |              |
|---------------|-------------|--------------|
| RigL_2x (ERK) | 93.3 ± 0.09 | 0.70x, 0.35x |
|---------------|-------------|--------------|

### ▼ Visualization & Plotting Code

Run `make vis`.

## Misc

This section may be useful if you desire to extend this code base or understand its structure. `main.py` is the python file used for training-evaluating, and the `make` commands serve as a wrapper for it.

### ▼ Print current config

We use [hydra](#) to handle configs.

```
python main.py --cfg job
```

See `conf/configs` for a detailed list of default configs, and under each folder of `conf` for possible options.

### ▼ Understanding the config setup

We split configs into various config groups for brevity.

Config groups (example):

- masking
- optimizer
- dataset etc.

Hydra allows us to override these either group-wise or globally as described below.

### ▼ Overriding options / group configs

```
python main.py masking=RigL wandb.use=True
```

Refer to [hydra's documentation](#) for more details.

### ▼ Exhaustive config options

See `conf/config.yaml` and the defaults it uses (eg: `dataset: CIFAR10` , `optimizer: SGD` , etc.).

### ▼ Using specific configs

Sometimes, we want to store the specific config of a run with tuned options across mutiple groups (masking, optimizer etc.)

To do so:

- store your config under `specific/`.
- each YAML file must start with a `# @package _global_` directive. See `specific/` for existing examples.
- override only what has changed, i.e., donot keep redundant arguments, which the base config ( `config.yaml` ) already covers.

Syntax:

```
python main.py +specific=cifar_wrn_22_2_rigl
```

## References

1. Rigging the Lottery: Making All Tickets Winners, [Original Paper](#).
2. Our report on OpenReview.
