# Supplementary material
Source: ML conference proceedings conference paper supplement (https://openreview.net/forum?id=riCIeP6LzEE)
Supplement: supplementary_material [file attachment]

---

# [Supplementary] Reproducibility Report Rigging the Lottery: Making All Tickets Winners

---

Anonymous Author(s)

Affiliation

Address

email

## 1 Architecture Specific Details—ResNet-50 on CIFAR100

Table 1: **ResNet-50 architecture used on CIFAR100**. Building blocks are shown in brackets, with the numbers of blocks stacked. Downsampling is performed by conv3\_1, conv4\_1, and conv5\_1 with a stride of 2.

| Layer Name | Output Size    | ResNet-50                                                                                       |
|------------|----------------|-------------------------------------------------------------------------------------------------|
| conv1      | $32 \times 32$ | $3 \times 3$ , 64, no stride                                                                    |
| conv2_x    | $32 \times 32$ | $\begin{bmatrix} 1 \times 1, 64 \\ 3 \times 3, 64 \\ 1 \times 1, 256 \end{bmatrix} \times 3$    |
| conv3_x    | $16 \times 16$ | $\begin{bmatrix} 1 \times 1, 128 \\ 3 \times 3, 128 \\ 1 \times 1, 512 \end{bmatrix} \times 4$  |
| conv4_x    | $8 \times 8$   | $\begin{bmatrix} 1 \times 1, 256 \\ 3 \times 3, 256 \\ 1 \times 1, 1024 \end{bmatrix} \times 6$ |
| conv5_x    | $4 \times 4$   | $\begin{bmatrix} 1 \times 1, 512 \\ 3 \times 3, 512 \\ 1 \times 1, 2048 \end{bmatrix} \times 3$ |
|            | $1 \times 1$   | average pool, 100-d fc, softmax                                                                 |
| FLOPs      |                | 2.59e9                                                                                          |

We use a variant of the originally proposed ResNet architecture (He et al. [2016]). Particularly, we replace the initial  $7 \times 7$  conv layer with a  $3 \times 3$  conv layer. Here, “conv layer” refers to convolution followed by batchnorm (Ioffe and Szegedy [2015]) and ReLU activation. This is intended to not excessively downsample the image—CIFAR-100 (Alex Krizhevsky [2009]) has images of dimensions  $32 \times 32$ , compared to Imagenet’s (Russakovsky et al. [2015])  $224 \times 224$ . Each block used (conv2\_x, conv3\_x, etc.) is a bottleneck block, and uses the conv-batchnorm-ReLU ordering.

## 2 FLOP Counting Procedure

Following Evci et al. [2020], we base our counting procedure on the Micronet Challenge<sup>1</sup>, which was conducted as a part of NeurIPS 2019. Support for unstructured sparsity is assumed while computing the number of additions and multiplication operations. The sum of these two gives us the theoretical FLOPs for a single forward pass through the model.

Concretely, let the FLOPs required for a forward pass through a dense model be  $f_d$  and the corresponding for a sparse model (or small-dense model) be  $f_s$ . Then, the FLOPs for training a dense model are  $3f_d$ —since the backward pass involves computing gradients with respect to each weight and activation.  $f_s$  can be computed for a model given its sparsity distribution via the counting procedure. The FLOPs required to train a sparse model depend on the technique used, as detailed below.

### 2.1 Inference FLOPs

**Small-Dense, RigL, SET, Static** These methods involve constant layer-wise sparsity throughout training, hence the FLOP count can be determined during any step. The FLOP count for Random initialized models are  $(1 - s)$  times the Dense FLOPs.

**SNFS, Pruning** Both methods involve varying layer-wise sparsity during training, and hence non-constant FLOP consumption. The final weights are used to determine inference FLOPs in this case.

### 2.2 Train FLOPs

**Small-Dense, Static** Dense gradients are not required by these models, and hence have a train FLOP count of  $3f_s$ .

**SET** Dense gradients are not required, and random growth can be implemented quite efficiently. Thus, the train FLOP count is  $3f_s$ .

**RigL** Dense gradients are required only every  $\Delta T$  steps, hence the corresponding train FLOP count is:  $\frac{3\Delta T f_s + 2f_s + f_d}{\Delta T + 1}$ . We note that since  $\Delta T$  is typically set between 100–1000, the preceding expression is quite close to  $3f_s$ .

**SNFS** Dense gradients are required at each training step, resulting in  $2f_s + f_d$  FLOPs consumed at each step. Since the sparse FLOP count varies as we train, the average FLOP count is:  $2\mathbb{E}[f_{s,t}] + f_d$ , where  $f_{s,t}$  is the sparse inference FLOPs at train step  $t$ .

**Pruning** Does not require dense gradients, but the sparsity increases smoothly from 0% to the target value as we train. The FLOP consumption here is  $3\mathbb{E}[f_{s,t}]$ , where  $f_{s,t}$  is the sparse inference FLOPs at train step  $t$ .

To determine  $\mathbb{E}[f_{s,t}]$ , we compute a running average of the FLOP consumption after every epoch. Notably, we find that the inference cost of Pruning is often close to a Random initialized sparse network, while SNFS, regardless of initialization, is compute-intensive.

## 3 Trial Space of Hyperparameter Tuning

Figure 1 shows the hyper-parameter study for tuning  $(\alpha, \Delta T)$  as a contour plot. We observe that for multiple initialization-density configurations, the reference choice ( $\alpha = 0.3, \Delta T = 100$ ), is quite close to the optimal hyperparameters. Furthermore, where they differ, the difference is within standard deviation bounds (Table 4 of the main report).

## 4 Dynamic Structured Sparsity

Present hardware accelerators lack efficient implementations for unstructured sparsity. As a result, in practice, the reduced FLOP requirement of sparse methods rarely translate to wall-clock improvements. In comparison, there are efficient implementations available for structured (or block) sparsity which reach theoretical speedups (Gray et al. [2017], Teja Vooturi et al. [2019]). Motivated by this, we try modifying *RigL* to explicitly work on structured sparsity.

<sup>1</sup><https://micronet-challenge.github.io/>

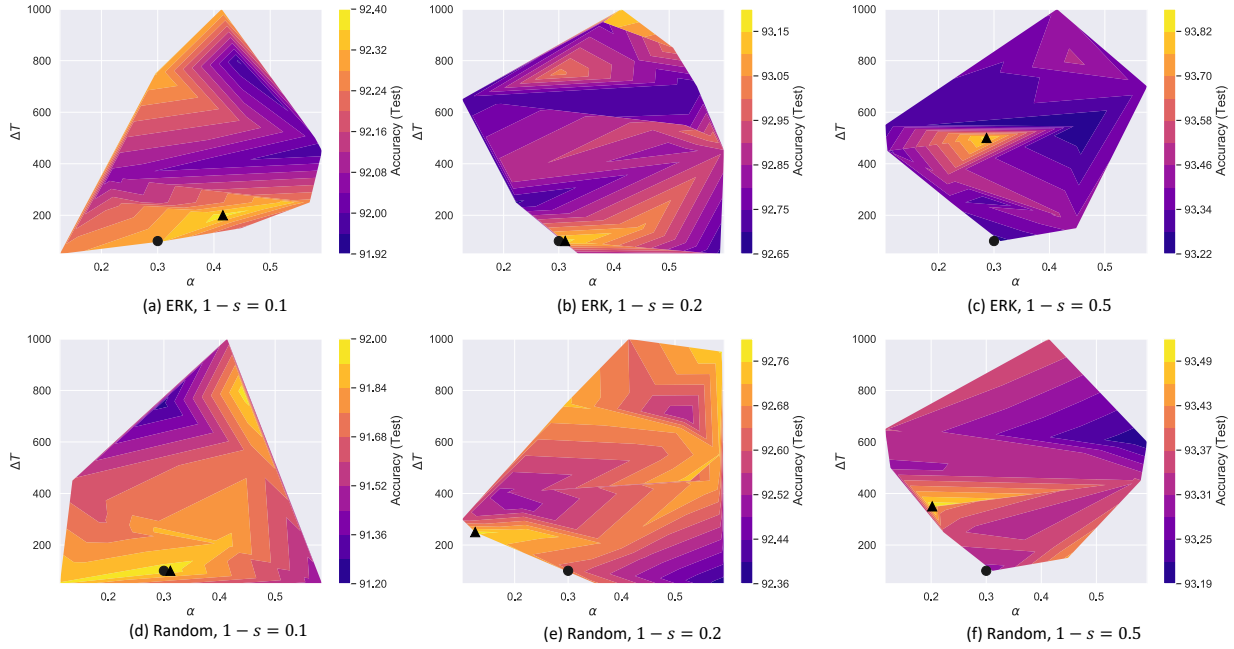

Figure 1: **Trial space of tuning** ( $\alpha$ ,  $\Delta T$ ), shown as a contour plot. Here, black circle corresponds to  $(\alpha = 0.3, \Delta T = 100)$ , while black triangle corresponds to the optimal hyper-parameter pair found. We plot the convex hull of the trial space, so in a few cases the reference point lies on the border of this space.

Table 2: **Modifying *RigL* for structured sparsity, compared on CIFAR-10 and CIFAR-100 datasets.** *RigL*-struct fails to match the accuracy of *RigL* and just matches Small-Dense in performance.

| Method                | CIFAR-10                      |                        |                               |                        | CIFAR-100                     |                        |                               |                        |
|-----------------------|-------------------------------|------------------------|-------------------------------|------------------------|-------------------------------|------------------------|-------------------------------|------------------------|
|                       | $1-s = 0.1$                   |                        | $1-s = 0.2$                   |                        | $1-s = 0.1$                   |                        | $1-s = 0.2$                   |                        |
|                       | Accuracy $\uparrow$<br>(Test) | Wall Time $\downarrow$ |
| Small-Dense           | 89.0 $\pm$ 0.35               | 0.11x                  | 91.0 $\pm$ 0.07               | 0.20x                  | 70.8 $\pm$ 0.22               | 0.11x                  | 72.6 $\pm$ 0.93               | 0.20x                  |
| Random Initialization |                               |                        |                               |                        |                               |                        |                               |                        |
| RigL                  | 91.7 $\pm$ 0.18               | 1.0x                   | 92.9 $\pm$ 0.10               | 1.0x                   | 71.8 $\pm$ 0.33               | 1.0x                   | 73.5 $\pm$ 0.04               | 1.0x                   |
| RigL-Struct           | 87.0 $\pm$ 0.09               | 0.10x                  | 90.4 $\pm$ 0.27               | 0.20x                  | 69.1 $\pm$ 0.11               | 0.10x                  | 71.9 $\pm$ 0.13               | 0.20x                  |
| ERK Initialization    |                               |                        |                               |                        |                               |                        |                               |                        |
| RigL                  | 92.4 $\pm$ 0.06               | 1.0x                   | 93.1 $\pm$ 0.09               | 1.0x                   | 72.6 $\pm$ 0.37               | 1.0x                   | 73.4 $\pm$ 0.15               | 1.0x                   |
| RigL-Struct           | 89.6 $\pm$ 0.16               | 0.17x                  | 91.3 $\pm$ 0.18               | 0.35x                  | 71.1 $\pm$ 0.15               | 0.23x                  | 72.9 $\pm$ 0.08               | 0.38x                  |

We promote channel sparsity for convolutional layers and keep fully connected layers dense. Mask update steps also operate at the channel level, based on *RigL*'s growth and pruning criterion. We name this method as *RigL*-struct. Such an approach is enticing, as we can remove masked-out channels, and obtain practical speedups on accelerators without needing support for unstructured sparsity.

Unfortunately, *RigL*-struct does not preserve the performance of originally proposed *RigL* (Table 2). In fact, it performs only as good as Small-Dense models, which negates the motivation behind such an experiment—Small-Dense models already achieve the intended speedups.

## References

Geoffrey Hinton Alex Krizhevsky. Learning multiple layers of features from tiny images. Technical report, 2009.

- 57 Utku Evci, Trevor Gale, Jacob Menick, Pablo Samuel Castro, and Erich Elsen. Rigging the lottery: Making all tickets  
58 winners. In *Proceedings of Machine Learning and Systems (ICML)*, July 2020.
- 59 Scott Gray, Alec Radford, and Diederik P Kingma. Gpu kernels for block-sparse weights. *arXiv preprint*  
60 *arXiv:1711.09224*, 3, 2017.
- 61 Kaiming He, Xiangyu Zhang, Shaoqing Ren, and Jian Sun. Deep residual learning for image recognition. In *Proceedings*  
62 *of the IEEE Conference on Computer Vision and Pattern Recognition (CVPR)*, June 2016.
- 63 Sergey Ioffe and Christian Szegedy. Batch normalization: Accelerating deep network training by reducing internal  
64 covariate shift. In *International Conference on Machine Learning (ICML)*, July 2015.
- 65 Olga Russakovsky, Jia Deng, Hao Su, Jonathan Krause, Sanjeev Satheesh, Sean Ma, Zhiheng Huang, Andrej Karpathy,  
66 Aditya Khosla, Michael Bernstein, Alexander C. Berg, and Li Fei-Fei. ImageNet Large Scale Visual Recognition Chal-  
67 lenge. *International Journal of Computer Vision (IJCV)*, 115(3):211–252, 2015. doi: 10.1007/s11263-015-0816-y.
- 68 Dharma Teja Vooturi, Girish Varma, and Kishore Kothapalli. Dynamic block sparse reparameterization of convolutional  
69 neural networks. In *Proceedings of the IEEE/CVF International Conference on Computer Vision (ICCV) Workshops*,  
70 Oct 2019.
